# Supplementary material for: Exploration of Candidate Korean Native Poaceae Plants for Breeding New Varieties as Garden Materials in the New Climate Regime
Source: Preprints.org preprint supplement (doi:10.20944/preprints202410.0111.v1), 2024-10-02
Supplement: Supplementary file 1 [file supplementary]

## Sheet: Sheet1
Plant Category	Korean Name	Classification	Family Name	Scientific Name	Last Modified Date
Native Plant	가는나래새	Species	Poaceae	Achnatherum sibiricum	2022/03/28
Native Plant	가는포아풀	Species	Poaceae	Poa matsumurae	2022/03/28
Native Plant	가을강아지풀	Species	Poaceae	Setaria faberi	2022/03/28
Native Plant	가지주름조개풀	Species	Poaceae	Oplismenus compositus	2022/03/28
Native Plant	가지쥐꼬리새	Species	Poaceae	Muhlenbergia ramosa	2022/03/28
Native Plant	각시그령	Species	Poaceae	Eragrostis japonica	2022/03/28
Native Plant	각시미꾸리광이	Species	Poaceae	Puccinellia chinampoensis	2022/03/28
Native Plant	갈대	Species	Poaceae	Phragmites australis	2022/03/28
Native Plant	갈풀	Species	Poaceae	Phalaris arundinacea	2022/03/28
Native Plant	갑산포아풀	Species	Poaceae	Poa ussuriensis	2022/03/28
Native Plant	갓대	Species	Poaceae	Sasa chiisanensis	2022/03/28
Native Plant	강아지풀	Species	Poaceae	Setaria viridis	2022/03/28
Native Plant	개기장	Species	Poaceae	Panicum bisulcatum	2022/03/28
Native Plant	개묵새	Species	Poaceae	Festuca nuda	2022/11/15
Native Plant	개밀아재비	Species	Poaceae	Leymus chinensis	2022/03/28
Native Plant	개보리	Species	Poaceae	Elymus sibiricus	2022/03/28
Native Plant	개빕새귀리	Species	Poaceae	Bromus richardsonii	2022/03/28
Native Plant	개솔새	Species	Poaceae	Cymbopogon goeringii	2022/03/28
Native Plant	개억새	Species	Poaceae	Eulalia speciosa	2022/03/28
Native Plant	개피	Species	Poaceae	Beckmannia syzigachne	2022/03/28
Native Plant	갯겨이삭	Species	Poaceae	Puccinellia coreensis	2022/03/28
Native Plant	갯그령	Species	Poaceae	Leymus mollis	2022/03/28
Native Plant	갯꾸러미풀	Species	Poaceae	Puccinellia nipponica	2022/03/28
Native Plant	갯보리	Species	Poaceae	Elymus dahuricus	2022/03/28
Native Plant	갯쇠돌피	Species	Poaceae	Polypogon monspeliensis	2022/03/28
Native Plant	갯쇠보리	Species	Poaceae	Ischaemum anthephoroides	2022/03/28
Native Plant	갯율무	Species	Poaceae	Crypsis aculeata	2022/03/28
Native Plant	갯잔디	Species	Poaceae	Zoysia sinica	2022/03/28
Native Plant	갯잠자리피	Species	Poaceae	Tripogon chinensis	2022/03/28
Native Plant	갯조풀	Species	Poaceae	Calamagrostis pseudophragmites	2022/03/28
Native Plant	검은겨이삭	Species	Poaceae	Agrostis canina	2022/03/28
Native Plant	검정겨이삭	Species	Poaceae	Agrostis flaccida	2022/03/28
Native Plant	검정진들피	Species	Poaceae	Glyceria debilior	2022/03/28
Native Plant	겨풀	Species	Poaceae	Leersia sayanuka	2022/03/28
Native Plant	고려개보리	Species	Poaceae	Hystrix coreana	2022/11/29
Native Plant	광릉개밀	Species	Poaceae	Agropyron koryoense	2022/03/28
Native Plant	광릉용수염	Species	Poaceae	Diarrhena fauriei	2022/03/28
Native Plant	교래잠자리피	Species	Poaceae	Tripogon longe-aristatus	2023/07/19
Native Plant	구내풀	Species	Poaceae	Poa hisauchii	2022/03/28
Native Plant	그령	Species	Poaceae	Eragrostis ferruginea	2022/03/28
Native Plant	금강아지풀	Species	Poaceae	Setaria pumila	2022/03/28
Native Plant	금강포아풀	Species	Poaceae	Poa kumgansanii	2022/03/28
Native Plant	기름새	Species	Poaceae	Spodiopogon cotulifer	2022/03/28
Native Plant	기장대풀	Species	Poaceae	Isachne globosa	2022/03/28
Native Plant	긴겨이삭	Species	Poaceae	Agrostis scabra	2022/03/28
Native Plant	긴왕포아풀	Species	Poaceae	Poa angustifolia	2022/03/28
Native Plant	긴진들피	Species	Poaceae	Glyceria arundinacea	2022/03/28
Native Plant	김의털	Species	Poaceae	Festuca ovina	2022/03/28
Native Plant	김의털아재비	Species	Poaceae	Festuca parvigluma	2022/03/28
Native Plant	껍질용수염	Species	Poaceae	Diarrhena mandshurica	2022/03/28
Native Plant	꼬리새	Species	Poaceae	Bromus remotiflorus	2022/03/28
Native Plant	나도개피	Species	Poaceae	Eriochloa villosa	2022/03/28
Native Plant	나도겨이삭	Species	Poaceae	Milium effusum	2022/03/28
Native Plant	나도겨풀	Species	Poaceae	Leersia japonica	2022/03/28
Native Plant	나도기름새	Species	Poaceae	Capillipedium parviflorum	2022/03/28
Native Plant	나도논피	Species	Poaceae	Echinochloa oryzoides	2023/10/12
Native Plant	나도딸기광이	Species	Poaceae	Cinna latifolia	2022/03/28
Native Plant	나도바랭이새	Species	Poaceae	Microstegium vimineum	2022/03/28
Native Plant	나도잔디	Species	Poaceae	Sporobolus pilifer	2023/07/19
Native Plant	나래새	Species	Poaceae	Achnatherum pekinense	2022/03/28
Native Plant	낭림새풀	Species	Poaceae	Calamagrostis subacrochaeta	2022/03/28
Native Plant	논피	Species	Poaceae	Echinochloa oryzicola	2022/03/28
Native Plant	누운기장대풀	Species	Poaceae	Isachne nipponensis	2022/03/28
Native Plant	눈포아풀	Species	Poaceae	Poa palustris	2022/03/28
Native Plant	달뿌리풀	Species	Poaceae	Phragmites japonicus	2022/03/28
Native Plant	담상이삭풀	Species	Poaceae	Brachyelytrum japonicum	2022/03/28
Native Plant	대만피	Species	Poaceae	Echinochloa glabrescens	2022/03/28
Native Plant	대새풀	Species	Poaceae	Cleistogenes hackelii	2022/03/28
Native Plant	대택광이	Species	Poaceae	Glyceria spiculosa	2023/04/17
Native Plant	도랭이피	Species	Poaceae	Koeleria macrantha	2022/03/28
Native Plant	돌피	Species	Poaceae	Echinochloa crus-galli	2022/03/28
Native Plant	두메미꾸리광이	Species	Poaceae	Glyceria alnasteretum	2022/03/28
Native Plant	둔치개밀	Species	Poaceae	Elymus humidus	2022/03/28
Native Plant	드렁새	Species	Poaceae	Leptochloa chinensis	2022/03/28
Native Plant	들새풀	Species	Poaceae	Calamagrostis heterogluma	2022/03/28
Native Plant	뚝새풀	Species	Poaceae	Alopecurus aequalis	2022/03/28
Native Plant	띠	Species	Poaceae	Imperata cylindrica	2022/03/28
Native Plant	라프랜드새풀	Species	Poaceae	Calamagrostis lapponica	2022/03/28
Native Plant	모새달	Species	Poaceae	Phacelurus latifolius	2022/03/28
Native Plant	문수조릿대	Species	Poaceae	Arundinaria munsuensis	2022/03/28
Native Plant	물그령	Species	Poaceae	Eragrostis aquatica	2022/03/28
Native Plant	물억새	Species	Poaceae	Miscanthus sacchariflorus	2022/03/28
Native Plant	물억새아재비	Species	Poaceae	Miscanthus wangpicheonensis	2022/03/28
Native Plant	물잔디	Species	Poaceae	Pseudoraphis sordida	2022/03/28
Native Plant	민바랭이	Species	Poaceae	Digitaria violascens	2022/03/28
Native Plant	민바랭이새	Species	Poaceae	Microstegium japonicum	2022/03/28
Native Plant	바랭이	Species	Poaceae	Digitaria ciliaris	2022/03/28
Native Plant	바랭이새	Species	Poaceae	Bothriochloa ischaemum	2022/03/28
Native Plant	백두개밀	Species	Poaceae	Elymus nakaii	2022/03/28
Native Plant	백산새풀	Species	Poaceae	Calamagrostis angustifolia	2022/03/28
Native Plant	북선메뛰기피	Species	Poaceae	Calamagrostis monticola	2022/03/28
Native Plant	북왕포아풀	Species	Poaceae	Poa hatusimae	2022/03/28
Native Plant	붕겐새풀	Species	Poaceae	Calamagrostis bungeana	2022/03/28
Native Plant	비노리	Species	Poaceae	Eragrostis multicaulis	2022/03/28
Native Plant	빕새귀리	Species	Poaceae	Bromus ciliatus	2022/03/28
Native Plant	사할린새풀	Species	Poaceae	Calamagrostis sachalinensis	2022/03/28
Native Plant	산겨이삭	Species	Poaceae	Agrostis clavata	2022/03/28
Native Plant	산기장	Species	Poaceae	Phaenosperma globosum	2022/03/28
Native Plant	산대잎바랭이새	Species	Poaceae	Microstegium nudum	2022/03/28
Native Plant	산묵새	Species	Poaceae	Festuca japonica	2022/03/28
Native Plant	산새풀	Species	Poaceae	Calamagrostis purpurea	2022/03/28
Native Plant	산잠자리피	Species	Poaceae	Trisetum spicatum	2024/01/02
Native Plant	산조아재비	Species	Poaceae	Phleum alpinum	2022/03/28
Native Plant	산조풀	Species	Poaceae	Calamagrostis epigejos	2022/03/28
Native Plant	산향모	Species	Poaceae	Hierochloe alpina	2022/03/28
Native Plant	새포아풀	Species	Poaceae	Poa annua	2022/03/28
Native Plant	선쥐꼬리새	Species	Poaceae	Muhlenbergia hakonensis	2022/03/28
Native Plant	선포아풀	Species	Poaceae	Poa nemoralis	2022/03/28
Native Plant	섬조릿대	Species	Poaceae	Sasa kurilensis	2022/03/28
Native Plant	섬포아풀	Species	Poaceae	Poa takeshimana	2022/03/28
Native Plant	성긴포아풀	Species	Poaceae	Poa tuberifera	2022/03/28
Native Plant	속털개밀	Species	Poaceae	Elymus ciliaris	2022/03/28
Native Plant	솔새	Species	Poaceae	Themeda triandra	2022/03/28
Native Plant	쇠돌피	Species	Poaceae	Polypogon fugax	2022/03/28
Native Plant	쇠치기풀	Species	Poaceae	Hemarthria sibirica	2022/03/28
Native Plant	쇠풀	Species	Poaceae	Schizachyrium brevifolium	2022/03/28
Native Plant	수수새	Species	Poaceae	Sorghum nitidum	2023/02/24
Native Plant	수염개밀	Species	Poaceae	Hystrix longe-aristata	2022/03/28
Native Plant	수염풀	Species	Poaceae	Ptilagrostis alpina	2023/07/12
Native Plant	수크령	Species	Poaceae	Pennisetum alopecuroides	2022/03/28
Native Plant	숲개밀	Species	Poaceae	Brachypodium sylvaticum	2022/03/28
Native Plant	시베리아잠자리피	Species	Poaceae	Sibirotrisetum sibiricum	2024/01/08
Native Plant	시베리아포아풀	Species	Poaceae	Poa sibirica	2022/03/28
Native Plant	신이대	Species	Poaceae	Sasa coreana	2022/03/28
Native Plant	실새풀	Species	Poaceae	Calamagrostis arundinacea	2022/03/28
Native Plant	실포아풀	Species	Poaceae	Poa acroleuca	2022/03/28
Native Plant	쌀새	Species	Poaceae	Melica onoei	2022/03/28
Native Plant	애기포아풀	Species	Poaceae	Poa versicolor	2022/03/28
Native Plant	애기향모	Species	Poaceae	Hierochloe glabra	2022/03/28
Native Plant	엉성겨이삭	Species	Poaceae	Agrostis divaricatissima	2022/03/28
Native Plant	여름개밀	Species	Poaceae	Elymus shandongensis	2022/03/28
Native Plant	왕김의털	Species	Poaceae	Festuca rubra	2022/03/28
Native Plant	왕김의털아재비	Species	Poaceae	Festuca extremiorientalis	2022/03/28
Native Plant	왕미꾸리광이	Species	Poaceae	Glyceria leptolepis	2022/03/28
Native Plant	왕바랭이	Species	Poaceae	Eleusine indica	2022/03/28
Native Plant	왕쌀새	Species	Poaceae	Melica nutans	2022/03/28
Native Plant	왕잔디	Species	Poaceae	Zoysia macrostachya	2022/03/28
Native Plant	용수염	Species	Poaceae	Diarrhena japonica	2022/03/28
Native Plant	우산잔디	Species	Poaceae	Cynodon dactylon	2022/03/28
Native Plant	울릉포아풀	Species	Poaceae	Poa ullungdoensis	2022/03/28
Native Plant	은이삭풀	Species	Poaceae	Festuca sibirica	2022/03/28
Native Plant	이대	Species	Poaceae	Pseudosasa japonica	2022/03/28
Native Plant	자주개밀	Species	Poaceae	Elymus pendulinus	2022/03/28
Native Plant	자주포아풀	Species	Poaceae	Poa glauca	2022/03/28
Native Plant	잔디	Species	Poaceae	Zoysia japonica	2022/03/28
Native Plant	잔디바랭이	Species	Poaceae	Dimeria ornithopoda	2022/03/28
Native Plant	잠자리피	Species	Poaceae	Sibirotrisetum bifidum	2024/01/08
Native Plant	장수억새	Species	Poaceae	Miscanthus latissimus	2022/11/08
Native Plant	장억새	Species	Poaceae	Miscanthus changii	2022/03/28
Native Plant	제주조릿대	Species	Poaceae	Sasa quelpaertensis	2022/03/28
Native Plant	조개풀	Species	Poaceae	Arthraxon hispidus	2022/03/28
Native Plant	조릿대	Species	Poaceae	Sasamorpha borealis	2024/04/16
Native Plant	조릿대풀	Species	Poaceae	Lophatherum gracile	2022/03/28
Native Plant	조아재비	Species	Poaceae	Setaria chondrachne	2022/03/28
Native Plant	좀겨풀	Species	Poaceae	Leersia oryzoides	2022/03/28
Native Plant	좀꾸러미풀	Species	Poaceae	Poa radula	2022/03/28
Native Plant	좀물뚝새	Species	Poaceae	Sacciolepis indica	2023/02/24
Native Plant	좀미꾸리광이	Species	Poaceae	Torreyochloa pallida	2022/03/28
Native Plant	좀민바랭이	Species	Poaceae	Digitaria ischaemum	2022/03/28
Native Plant	좀바랭이	Species	Poaceae	Digitaria radicosa	2022/03/28
Native Plant	좀새그령	Species	Poaceae	Eragrostis minor	2022/03/28
Native Plant	좀새포아풀	Species	Poaceae	Poa deschampsioides	2022/03/28
Native Plant	좀새풀	Species	Poaceae	Deschampsia cespitosa	2022/03/28
Native Plant	좀조개풀	Species	Poaceae	Coelachne japonica	2022/03/28
Native Plant	주름조개풀	Species	Poaceae	Oplismenus undulatifolius	2022/03/28
Native Plant	줄	Species	Poaceae	Zizania latifolia	2022/03/28
Native Plant	쥐꼬리새	Species	Poaceae	Muhlenbergia japonica	2022/03/28
Native Plant	쥐꼬리새풀	Species	Poaceae	Sporobolus fertilis	2022/03/28
Native Plant	진들피	Species	Poaceae	Glyceria ischyroneura	2022/03/28
Native Plant	진퍼리새	Species	Poaceae	Molinia japonica	2022/03/28
Native Plant	참나래새	Species	Poaceae	Patis coreana	2023/07/12
Native Plant	참새귀리	Species	Poaceae	Bromus japonicus	2022/03/28
Native Plant	참새그령	Species	Poaceae	Eragrostis cilianensis	2022/03/28
Native Plant	참새피	Species	Poaceae	Paspalum thunbergii	2022/03/28
Native Plant	참쌀새	Species	Poaceae	Melica scabrosa	2022/03/28
Native Plant	참억새	Species	Poaceae	Miscanthus sinensis	2022/03/28
Native Plant	천도미꾸리광이	Species	Poaceae	Puccinellia pumila	2022/03/28
Native Plant	청쌀새	Species	Poaceae	Melica grandiflora	2022/03/28
Native Plant	총전광이	Species	Poaceae	Glyceria lithuanica	2022/03/28
Native Plant	코마로브포아풀	Species	Poaceae	Poa komarovii	2022/03/28
Native Plant	큰겨이삭	Species	Poaceae	Agrostis dimorpholemma	2022/03/28
Native Plant	큰기름새	Species	Poaceae	Spodiopogon sibiricus	2022/03/28
Native Plant	큰껍질새	Species	Poaceae	Melica turczaninowiana	2022/03/28
Native Plant	큰꾸러미풀	Species	Poaceae	Poa nipponica	2022/03/28
Native Plant	큰달뿌리풀	Species	Poaceae	Phragmites karka	2022/03/28
Native Plant	큰바랭이	Species	Poaceae	Digitaria setigera	2022/03/28
Native Plant	큰비노리	Species	Poaceae	Eragrostis pilosa	2022/03/28
Native Plant	큰쥐꼬리새	Species	Poaceae	Muhlenbergia huegelii	2022/03/28
Native Plant	털개밀	Species	Poaceae	Elymus gmelinii	2022/03/28
Native Plant	털개밀아재비	Species	Poaceae	Leymus secalinus	2022/03/28
Native Plant	털개억새	Species	Poaceae	Eulalia quadrinervis	2022/03/28
Native Plant	털나래새	Species	Poaceae	Achnatherum pubicalyx	2022/03/28
Native Plant	털들쇠보리	Species	Poaceae	Ischaemum aristatum	2022/03/28
Native Plant	털새	Species	Poaceae	Arundinella hirta	2022/03/28
Native Plant	털조릿대풀	Species	Poaceae	Lophatherum sinense	2022/03/28
Native Plant	평정죽	Species	Poaceae	Sasa tsuboiana	2023/04/14
Native Plant	포아풀	Species	Poaceae	Poa sphondylodes	2022/03/28
Native Plant	푸른선포아풀	Species	Poaceae	Poa alta	2022/03/28
Native Plant	피	Species	Poaceae	Echinochloa esculenta	2022/03/28
Native Plant	한라참새피	Species	Poaceae	Paspalum hallasanense	2022/03/28
Native Plant	향모	Species	Poaceae	Hierochloe odorata	2022/03/28
Native Plant	흰겨이삭	Species	Poaceae	Agrostis gigantea	2022/03/28
Cultivated Plant	가는잎나래새	Species	Poaceae	Stipa tenuissima	2011/12/08
Cultivated Plant	귀리	Species	Poaceae	Avena sativa	2022/03/28
Cultivated Plant	금잔디	Species	Poaceae	Zoysia matrella	2022/03/28
Cultivated Plant	기장	Species	Poaceae	Panicum miliaceum	2022/11/08
Cultivated Plant	꽃그령	Species	Poaceae	Eragrostis spectabilis	2011/12/08
Cultivated Plant	낚시귀리	Species	Poaceae	Chasmanthium latifolium	2022/03/28
Cultivated Plant	노랑줄무늬사사	Species	Poaceae	Pleioblastus viridistriatus	2011/12/08
Cultivated Plant	디켈라크네 크리니타	Species	Poaceae	Dichelachne crinita	2011/12/08
Cultivated Plant	라시아그로스티스 스피노사	Species	Poaceae	Lasiagrostis spinosa	2019/12/30
Cultivated Plant	레몬그래스	Species	Poaceae	Cymbopogon citratus	2011/12/08
Cultivated Plant	레이무스 아레나리우스	Species	Poaceae	Leymus arenarius	2011/12/08
Cultivated Plant	말총수염풀	Species	Poaceae	Stipa tirsa	2023/07/12
Cultivated Plant	물대	Species	Poaceae	Arundo donax	2022/03/28
Cultivated Plant	밀	Species	Poaceae	Triticum aestivum	2022/05/31
Cultivated Plant	밤부사 벤트리코사	Species	Poaceae	Bambusa ventricosa	2011/12/08
Cultivated Plant	벼	Species	Poaceae	Oryza sativa	2022/05/31
Cultivated Plant	병솔개밀	Species	Poaceae	Hystrix patula	2011/12/08
Cultivated Plant	보리	Species	Poaceae	Hordeum vulgare	2022/03/28
Cultivated Plant	보우텔로우아 그라킬리스	Species	Poaceae	Bouteloua gracilis	2011/12/08
Cultivated Plant	블루페스큐	Species	Poaceae	Festuca glauca	2011/12/08
Cultivated Plant	비단잔디	Species	Poaceae	Zoysia pacifica	2023/07/25
Cultivated Plant	비치조릿대	Species	Poaceae	Sasa veitchii	2011/12/08
Cultivated Plant	빗살새	Species	Poaceae	Cynosurus cristatus	2022/03/28
Cultivated Plant	사탕수수	Species	Poaceae	Saccharum officinarum	2014/07/03
Cultivated Plant	세슬레리아 니티다	Species	Poaceae	Sesleria nitida	2011/12/08
Cultivated Plant	수수	Species	Poaceae	Sorghum bicolor	2022/03/28
Cultivated Plant	아레나리우스갯보리	Species	Poaceae	Elymus arenarius	2011/12/08
Cultivated Plant	아우리코무스사사	Species	Poaceae	Pleioblastus auricomus	2011/12/08
Cultivated Plant	에리안투스 라베나이	Species	Poaceae	Erianthus ravennae	2011/12/08
Cultivated Plant	에리안투스 콘토르투스	Species	Poaceae	Erianthus contortus	2011/12/08
Cultivated Plant	엘리옷그령	Species	Poaceae	Eragrostis elliottii
Cultivated Plant	염주	Species	Poaceae	Coix lacryma-jobi	2022/03/28
Cultivated Plant	오리엔탈레수크령	Species	Poaceae	Pennisetum orientale	2011/12/08
Cultivated Plant	오죽	Species	Poaceae	Phyllostachys nigra	2022/03/28
Cultivated Plant	옥수수	Species	Poaceae	Zea mays	2022/05/31
Cultivated Plant	왕대	Species	Poaceae	Phyllostachys reticulata	2022/03/28
Cultivated Plant	은청바랭이새	Species	Poaceae	Andropogon scoparius	2011/12/08
Cultivated Plant	인도가시대나무	Species	Poaceae	Bambusa bambos	2023/05/24
Cultivated Plant	잔디김의털	Species	Poaceae	Festuca amethystina	2011/12/08
Cultivated Plant	조	Species	Poaceae	Setaria italica	2022/05/31
Cultivated Plant	죽순대	Species	Poaceae	Phyllostachys edulis	2023/02/24
Cultivated Plant	중방울새풀	Species	Poaceae	Briza media	2011/12/08
Cultivated Plant	짧은김의털	Species	Poaceae	Festuca abbreviata	2011/12/08
Cultivated Plant	청공작새	Species	Poaceae	Muhlenbergia lindheimeri	2011/12/08
Cultivated Plant	캥거루그래스	Species	Poaceae	Themeda australis	2011/12/08
Cultivated Plant	코리네포루스 카네스켄스	Species	Poaceae	Corynephorus canescens
Cultivated Plant	쿠스쿠에아 쿨레오우	Species	Poaceae	Chusquea culeou	2011/12/08
Cultivated Plant	큰나래새	Species	Poaceae	Celtica gigantea	2023/07/12
Cultivated Plant	큰방울새풀	Species	Poaceae	Briza maxima	2011/12/08
Cultivated Plant	클라우드그래스	Species	Poaceae	Agrostis nebulosa	2011/12/08
Cultivated Plant	털수염풀	Species	Poaceae	Nassella tenuissima	2023/05/24
Cultivated Plant	털수크령	Species	Poaceae	Pennisetum villosum	2011/12/08
Cultivated Plant	토끼꼬리풀	Species	Poaceae	Lagurus ovatus	2011/12/08
Cultivated Plant	트리코데스참새그령	Species	Poaceae	Eragrostis trichodes	2011/12/08
Cultivated Plant	트리티케일	Species	Poaceae	×Triticosecale Wittm.	2017/12/18
Cultivated Plant	팜파스그래스	Species	Poaceae	Cortaderia selloana	2022/03/28
Cultivated Plant	페스투카 스코파리아	Species	Poaceae	Festuca scoparia	2011/12/08
Cultivated Plant	페스투카 키네레아	Species	Poaceae	Festuca cinerea
Cultivated Plant	푸른도랑이피	Species	Poaceae	Koeleria glauca	2011/12/08
Cultivated Plant	풍지초	Species	Poaceae	Hakonechloa macra	2011/12/08
Cultivated Plant	플렉수오사좀새풀	Species	Poaceae	Deschampsia flexuosa	2011/12/08
Cultivated Plant	핑크뮬리	Species	Poaceae	Muhlenbergia capillaris	2023/07/28
Cultivated Plant	해장죽	Species	Poaceae	Arundinaria simonii	2022/05/31
Cultivated Plant	호밀	Species	Poaceae	Secale cereale	2022/03/28
Cultivated Plant	황조죽	Species	Poaceae	Phyllostachys aureosulcata	2011/12/08
Cultivated Plant	흰줄무늬사사	Species	Poaceae	Pleioblastus fortunei	2011/12/08
Exotic Plant	가는수크령	Species	Poaceae	Pennisetum flaccidum	2023/03/17
Exotic Plant	개나래새	Species	Poaceae	Arrhenatherum elatius	2022/03/28
Exotic Plant	개사탕수수	Species	Poaceae	Saccharum spontaneum	2022/03/28
Exotic Plant	개쇠치기풀	Species	Poaceae	Rottboellia cochinchinensis	2022/03/28
Exotic Plant	개이삭포아풀	Species	Poaceae	Poa bulbosa	2022/03/28
Exotic Plant	갯줄풀	Species	Poaceae	Spartina alterniflora	2022/03/28
Exotic Plant	겨이삭아재비	Species	Poaceae	Apera spica-venti	2023/05/09
Exotic Plant	고사리새	Species	Poaceae	Catapodium rigidum	2023/10/11
Exotic Plant	구주개밀	Species	Poaceae	Elymus repens	2022/03/28
Exotic Plant	긴까락보리풀	Species	Poaceae	Hordeum jubatum	2022/03/28
Exotic Plant	긴까락빕새귀리	Species	Poaceae	Bromus rigidus	2023/10/11
Exotic Plant	긴은털새	Species	Poaceae	Aira elegans	2022/03/28
Exotic Plant	긴털참새귀리	Species	Poaceae	Bromus alopecuros	2022/03/28
Exotic Plant	긴흰털새	Species	Poaceae	Holcus mollis	2022/03/28
Exotic Plant	까락빕새귀리	Species	Poaceae	Bromus sterilis	2023/10/11
Exotic Plant	꼬인새	Species	Poaceae	Danthonia spicata	2022/03/28
Exotic Plant	나도강아지풀	Species	Poaceae	Cenchrus latifolius	2022/03/28
Exotic Plant	나도바랭이	Species	Poaceae	Chloris virgata	2022/03/28
Exotic Plant	나도뿔이삭풀	Species	Poaceae	Hainardia cylindrica	2022/03/28
Exotic Plant	나도솔새	Species	Poaceae	Andropogon virginicus	2022/03/28
Exotic Plant	날개카나리새풀	Species	Poaceae	Phalaris paradoxa	2022/03/28
Exotic Plant	넓은김의털	Species	Poaceae	Festuca pratensis	2022/03/28
Exotic Plant	능수참새그령	Species	Poaceae	Eragrostis curvula	2022/03/28
Exotic Plant	대청가시풀	Species	Poaceae	Cenchrus longispinus	2022/03/28
Exotic Plant	댕돌보리	Species	Poaceae	Lolium rigidum	2022/03/28
Exotic Plant	독보리	Species	Poaceae	Lolium temulentum	2023/10/11
Exotic Plant	들겨이삭	Species	Poaceae	Agrostis capillaris	2022/03/28
Exotic Plant	들묵새	Species	Poaceae	Vulpia myuros	2022/03/28
Exotic Plant	들묵새아재비	Species	Poaceae	Vulpia bromoides	2022/03/28
Exotic Plant	들비노리	Species	Poaceae	Eragrostis pectinacea	2022/03/28
Exotic Plant	들참새귀리	Species	Poaceae	Bromus arvensis	2023/09/13
Exotic Plant	메귀리	Species	Poaceae	Avena fatua	2022/03/28
Exotic Plant	물참새피	Species	Poaceae	Paspalum distichum	2022/03/28
Exotic Plant	미국개기장	Species	Poaceae	Panicum dichotomiflorum	2022/03/28
Exotic Plant	민둥참새귀리	Species	Poaceae	Bromus racemosus	2022/03/28
Exotic Plant	민둥참새피	Species	Poaceae	Paspalum notatum	2022/03/28
Exotic Plant	방석기장	Species	Poaceae	Dichanthelium acuminatum	2022/03/28
Exotic Plant	방울새풀	Species	Poaceae	Briza minor	2022/03/28
Exotic Plant	보리풀	Species	Poaceae	Hordeum murinum	2023/10/11
Exotic Plant	비리새풀	Species	Poaceae	Aegilops caudata	2022/03/28
Exotic Plant	뿔이삭풀	Species	Poaceae	Parapholis incurva	2022/03/28
Exotic Plant	사방김의털	Species	Poaceae	Festuca heterophylla	2022/03/28
Exotic Plant	성긴이삭풀	Species	Poaceae	Bromus carinatus	2022/03/28
Exotic Plant	시리아수수새	Species	Poaceae	Sorghum halepense	2022/03/28
Exotic Plant	애기겨이삭	Species	Poaceae	Agrostis stolonifera	2022/03/28
Exotic Plant	애기카나리새풀	Species	Poaceae	Phalaris minor	2023/10/11
Exotic Plant	열대피	Species	Poaceae	Echinochloa colonum	2022/03/28
Exotic Plant	염소풀	Species	Poaceae	Aegilops cylindrica	2022/03/28
Exotic Plant	영국갯끈풀	Species	Poaceae	Spartina anglica	2022/03/28
Exotic Plant	오리새	Species	Poaceae	Dactylis glomerata	2022/03/28
Exotic Plant	왕포아풀	Species	Poaceae	Poa pratensis	2022/08/05
Exotic Plant	외대쇠치기아재비	Species	Poaceae	Eremochloa ophiuroides	2022/03/28
Exotic Plant	유럽강아지풀	Species	Poaceae	Setaria verticillata	2022/03/28
Exotic Plant	유럽뚝새풀	Species	Poaceae	Alopecurus geniculatus	2022/03/28
Exotic Plant	유럽육절보리풀	Species	Poaceae	Glyceria declinata	2022/03/28
Exotic Plant	은털새	Species	Poaceae	Aira caryophyllea	2022/03/28
Exotic Plant	작은조아재비	Species	Poaceae	Phleum paniculatum	2022/03/28
Exotic Plant	좀들묵새	Species	Poaceae	Vulpia octoflora	2022/09/27
Exotic Plant	좀보리풀	Species	Poaceae	Hordeum pusillum	2023/10/11
Exotic Plant	좀빗살새	Species	Poaceae	Cynosurus echinatus	2022/03/28
Exotic Plant	좀참새귀리	Species	Poaceae	Bromus inermis	2022/03/28
Exotic Plant	좀포아풀	Species	Poaceae	Poa compressa	2023/10/11
Exotic Plant	쥐꼬리뚝새풀	Species	Poaceae	Alopecurus myosuroides	2022/03/28
Exotic Plant	쥐보리	Species	Poaceae	Lolium multiflorum	2022/03/28
Exotic Plant	지네발새	Species	Poaceae	Dactyloctenium aegyptium	2022/03/28
Exotic Plant	처진미꾸리광이	Species	Poaceae	Puccinellia distans	2022/03/28
Exotic Plant	카나리새풀	Species	Poaceae	Phalaris canariensis	2022/03/28
Exotic Plant	큰개기장	Species	Poaceae	Panicum virgatum	2022/03/28
Exotic Plant	큰개사탕수수	Species	Poaceae	Saccharum arundinaceum	2022/03/28
Exotic Plant	큰김의털	Species	Poaceae	Festuca arundinacea	2022/03/28
Exotic Plant	큰뚝새풀	Species	Poaceae	Alopecurus pratensis	2022/03/28
Exotic Plant	큰새포아풀	Species	Poaceae	Poa trivialis	2022/03/28
Exotic Plant	큰이삭풀	Species	Poaceae	Bromus catharticus	2022/03/28
Exotic Plant	큰조아재비	Species	Poaceae	Phleum pratense	2022/03/28
Exotic Plant	큰참새귀리	Species	Poaceae	Bromus secalinus	2022/03/28
Exotic Plant	큰참새피	Species	Poaceae	Paspalum dilatatum	2022/03/28
Exotic Plant	털뚝새풀	Species	Poaceae	Alopecurus japonicus	2022/03/28
Exotic Plant	털빕새귀리	Species	Poaceae	Bromus tectorum	2022/03/28
Exotic Plant	털참새귀리	Species	Poaceae	Bromus hordeaceus	2023/10/11
Exotic Plant	털큰참새귀리	Species	Poaceae	Bromus commutatus	2022/03/28
Exotic Plant	털큰참새피	Species	Poaceae	Paspalum urvillei	2022/03/28
Exotic Plant	향기풀	Species	Poaceae	Anthoxanthum odoratum	2022/03/28
Exotic Plant	호밀풀	Species	Poaceae	Lolium perenne	2022/03/28
Exotic Plant	흰털새	Species	Poaceae	Holcus lanatus	2023/10/11
